# Supplementary material for: Systemic Bevacizumab for Recurrent Respiratory Papillomatosis: A Scoping Review from 2009 to 2022
Source: MDPI journal article supplement (doi:10.3390/children10010054), 2022-12-26
Supplement: s1 [file s1]

## Anexe 1. Search Strategy

### 1.1. Search for MEDLINE (Pubmed):

|                                                                                                                                                                                                   |                                      |
|---------------------------------------------------------------------------------------------------------------------------------------------------------------------------------------------------|--------------------------------------|
| ((("bevacizumab"[MeSH Terms] OR "bevacizumab"[All Fields]) OR "bevacizumab s"[All Fields]) OR "systemic bevacizumab"[All Fields]) AND ("Recurrent respiratory papillomatosis"[Title/Abstract] AND | Bevacizumab                          |
| "Recurrent respiratory papillomatosis"[Title/Abstract] OR "Human papillomavirus 11"[All Fields]) OR "papilloma"[All Fields]                                                                       | Recurrent Respiratory Papillomatosis |

### 1.2. Search for LILACS (LILACS BVS search):

|                                                                                                                                                  |                                      |
|--------------------------------------------------------------------------------------------------------------------------------------------------|--------------------------------------|
| mh:(bevacizumab) or tw:(systemic bevacizumab) AND tw:(Recurrent respiratory papillomatosis)                                                      | Bevacizumab                          |
| tw:(Human papillomavirus 11) or mh:(papilloma) or tw:(papilomatosis recurrenente respiratoria) or mh:(papiloma) or tw:(papillomavirus humano 11) | Recurrent Respiratory Papillomatosis |

### 1.3. Search for EMBASE:

|                                                                                                   |                                      |
|---------------------------------------------------------------------------------------------------|--------------------------------------|
| 'bevacizumab'/mj or 'systemic bevacizumab':ab,ti AND                                              | Bevacizumab                          |
| 'Recurrent respiratory papillomatosis':ab,ti OR 'human papillomavirus 11':ab,ti or 'papilloma'/mj | Recurrent Respiratory Papillomatosis |

### 1.4 Search for Global Health (Ovid):

|                                         |             |
|-----------------------------------------|-------------|
| bevacizumab or systemic bevacizumab AND | Bevacizumab |
|-----------------------------------------|-------------|

|                                                                                         |                                      |
|-----------------------------------------------------------------------------------------|--------------------------------------|
| recurrent respiratory papillomatosis OR<br>papillomatosis OR Human papillomavirus<br>11 | Recurrent Respiratory Papillomatosis |
|-----------------------------------------------------------------------------------------|--------------------------------------|

#### 1.5. Search for ClinicalTrials:

|                                                                                         |                                      |
|-----------------------------------------------------------------------------------------|--------------------------------------|
| bevacizumab or systemic bevacizumab<br><b>AND</b>                                       | Bevacizumab                          |
| recurrent respiratory papillomatosis OR<br>papillomatosis OR Human papillomavirus<br>11 | Recurrent Respiratory Papillomatosis |
